# Supplementary material for: Mechanical and electrical properties of multiwall carbon nanotube/polycarbonate composites for electrostatic discharge and electromagnetic interference shielding applications
Source: Royal Society of Chemistry journal article supplement (doi:10.1039/c3ra47387b), 2014-01-01
Supplement: c3ra47387b1.pdf [file c3ra47387b1.pdf]

## Mechanical and electrical properties of multiwall carbon nanotube/polycarbonate composites for electrostatic discharge and electromagnetic interference shielding applications

Shailaja Pande\*, Anisha Chaudhary, Deepak Patel, Bhanu P. Singh and  
Rakesh B. Mathur

Physics and Engineering of Carbon, Division of Materials Physics and Engineering, CSIR-  
National Physical Laboratory, New Delhi – 110012, INDIA

### Electronic Supplementary Information

#### SP1. ESD Studies

John Chubb Instrument (JCI 155 v5) charge decay test unit was used for ESD studies for the measurement of static decay time of f-MWCNT/PC samples at room temperature. John JCI 155 v5 charge decay test unit is a compact instrument for easy and direct measurement of the ability of materials to dissipate static electricity and to assess whether significant voltage will arise from practical amount of charge transferred to surface. The static decay time was measured by applying a positive as well as negative high corona voltage of 5000 V on the surface of material to be tested and recording the decay time at 10% cut-off. A fast response electrostatic field meter observes the voltage received on the surface of sample and measurements were to observe how quickly the voltage falls as the charge is dissipated from the film. The basic arrangement for measuring the corona charge transferred to the test sample during corona charge decay measurements is shown in the Fig. S1 (Ref. 27)

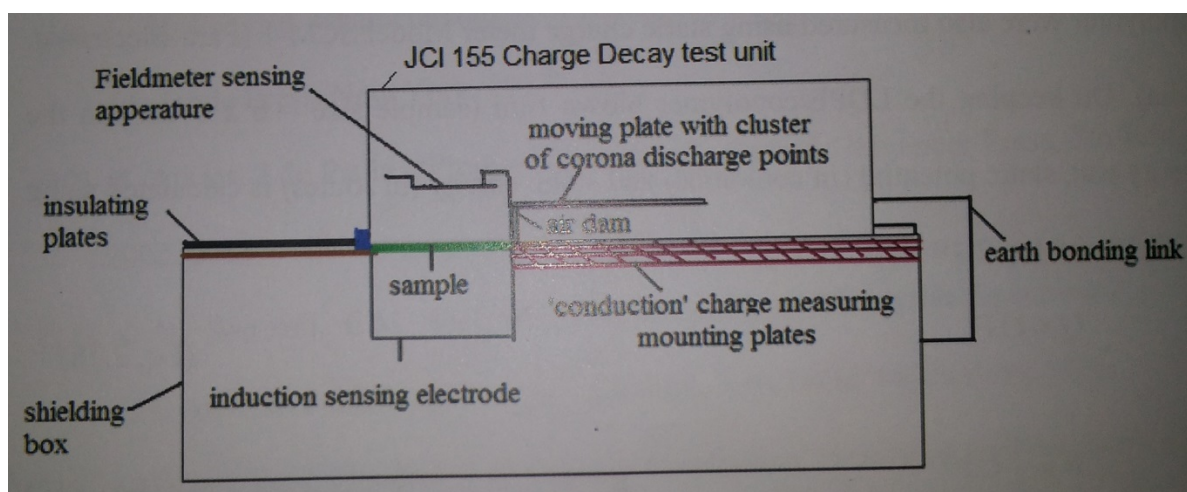

Fig S1 Schematic arrangement of JCI 155 v5

### SP2. Tensile stress-strain curve of 0.6 wt% f-MWCNT/PC composite

The tensile stress-strain curve of 0.6 wt% f-MWCNT/PC composite film is shown in Fig. S2. As evident from the figure there is yielding and plastic deformation resulting in a ductile failure (with necking and cold drawing) and rapid increase in stress at which failure occurred.

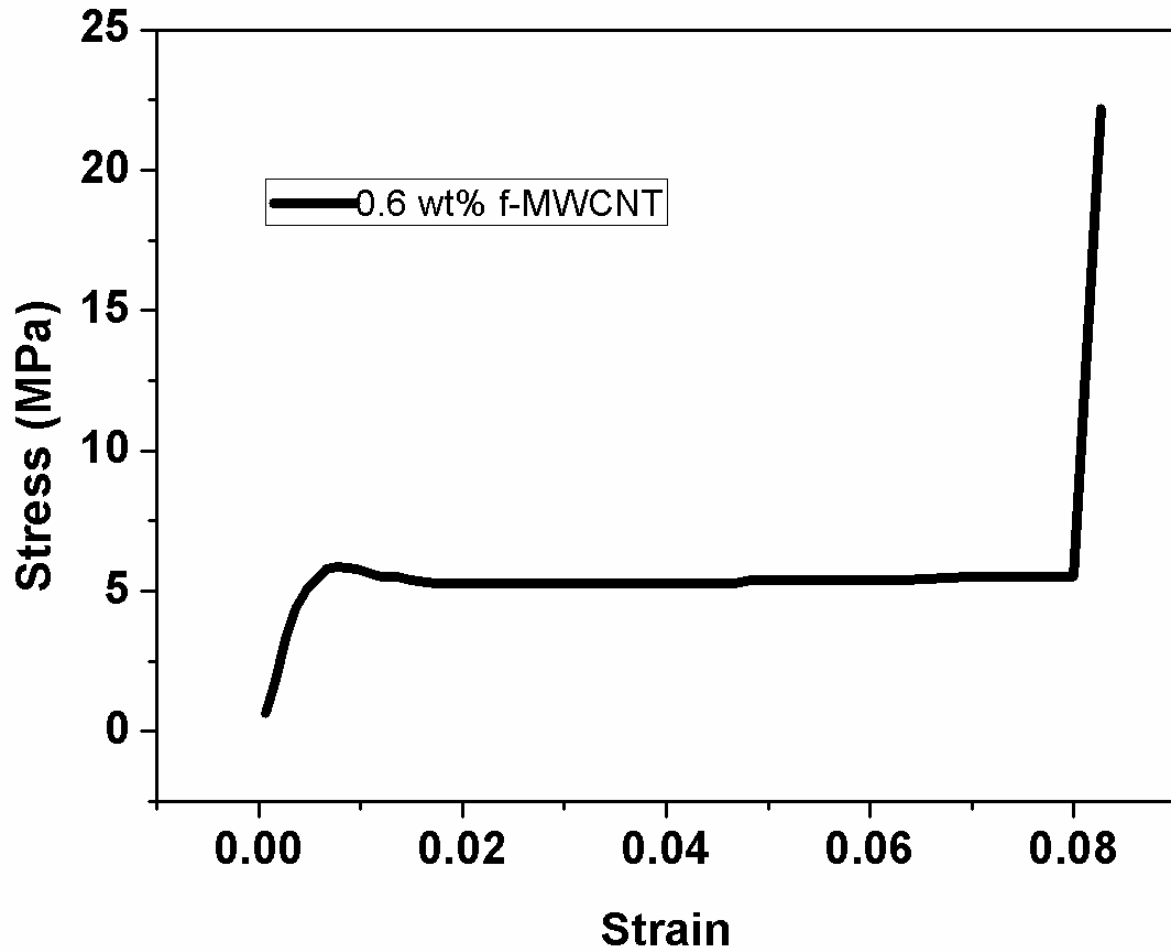

Fig. S2 Tensile stress-strain curve of 0.6 wt% f-MWCNT/PC composite film

### SP3. EMI SE

SE measurements were carried out in the 8.2-12.4 GHz microwave range and keeping the input power level at -5dBm (Ref. 38). The total EMI SE is the attenuation of ratio of electromagnetic waves produced inside the shield material and can be expressed as

$$SE_T(dB) = 10 \log \frac{p_I}{p_T} = 20 \log \left| \frac{E_I}{E_T} \right| = 20 \log \left| \frac{H_I}{H_T} \right| \quad (1)$$

where  $p_i$  ( $E_i$  or  $H_i$ ) and  $p_t$  ( $E_t$  or  $H_t$ ) are the incident and transmitted electromagnetic powers (electric or magnetic field) respectively. The total shielding can be expressed as sum of three terms:

$$SE_T = SE_R + SE_A + SE_M \quad (2)$$

Where,  $SE_R$ ,  $SE_A$  and  $SE_M$  are shielding due to reflection, absorption and multiple reflections respectively. In two port network analysis, the scattering ( $S$ ) parameter i.e.  $S_{11}$  (or  $S_{22}$ ),  $S_{21}$  (or  $S_{12}$ ) can be correlated to reflection and the transmission coefficients as:

$$T = \left| \frac{E_T}{E_I} \right|^2 = |S_{12}|^2 (= S_{12}^2) \quad (3)$$

$$R = \left| \frac{E_R}{E_I} \right|^2 = |S_{11}|^2 (= S_{11}^2) \quad (4)$$

The absorbance can then be calculated as

$$A = 1 - R - T \quad (5)$$

Here, the term A is given with respect to the power of the incident electromagnetic (EM) wave. If the effect of multiple reflection between both interfaces of the material is negligible, i.e.  $SE_M=0$ , the  $SE_T$  can be expressed as

$$SE_T = SE_R + SE_A \quad (6)$$

The relative intensity of the effectively incident EM wave inside the materials after reflection is based on the quantity as  $1-R$ . Therefore, the effective absorbance ( $A_{eff}$ ) can be described as

$$A_{eff} = \frac{(1-R-T)}{(1-R)} \quad (7)$$

with respect to the power of the effectively incident EM wave inside the shielding material.

So  $SE_R$  and  $SE_A$  are given as

$$SE_R = 10 \log(1-R) \quad \text{and} \quad (8)$$

$$SE_A = 10 \log(1 - A_{eff}) = 10 \log \left[ \frac{T}{(1-R)} \right] \quad (9)$$

**SP4. Flexural Stress-strain curve of 20 wt% a-MWCNT/PC composite processed by contact pressure (CP) compression molding method**

The flexural stress-strain curve of 20 wt% a-MWCNT/PC composite processed by contact pressure (CP) compression molding method is shown in Fig. S3. The average flexural modulus and flexural strength of the composite was 1837 MPa and 45 Mpa respectively.

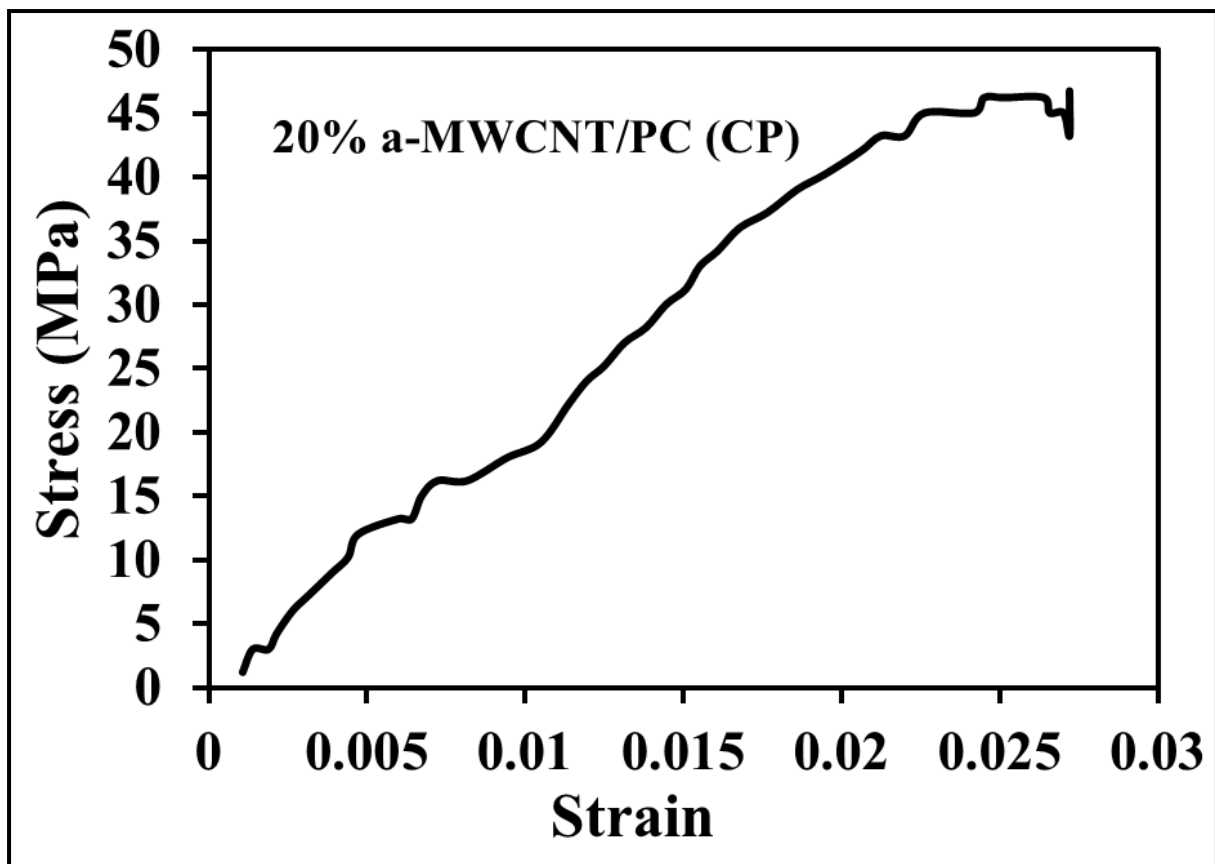

**Fig S3. Flexural Stress-Strain curve of 20 wt% a-MWCNT/PC composite processed by contact pressure (CP) compression molding method**
